# Supplementary material for: 64Cu Labeled Sarcophagine Exendin-4 for MicroPET Imaging of Glucagon like Peptide-1 Receptor Expression
Source: PubMed Central journal article supplement — Theranostics. 2014 May 24;4(8):770–7. doi: 10.7150/thno.7759 (PMC4063975; doi:10.7150/thno.7759), 2014-05-24
Supplement: thnov04p0770s1.pdf [file thnov04p0770s1.pdf]

## Supplementary data

### Blood clearance

Mice were injected with 3.7MBq of  $^{64}\text{Cu}$ -BaMalSar-exendin-4 or  $^{64}\text{Cu}$ -Mal<sub>2</sub>Sar-(exendin-4)<sub>2</sub>. Blood samples were collected from the mouse tails at 1 min, 15 min, 60 min, and 120 min. The samples were weighted and the radioactivity was measured with a r-counter (Wallach Wizard, PerkinElmer). %ID/g values were calculated.  $^{64}\text{Cu}$ -Mal<sub>2</sub>Sar-(exendin-4)<sub>2</sub> cleared slightly slower than  $^{64}\text{Cu}$ -BaMalSar-exendin-4.

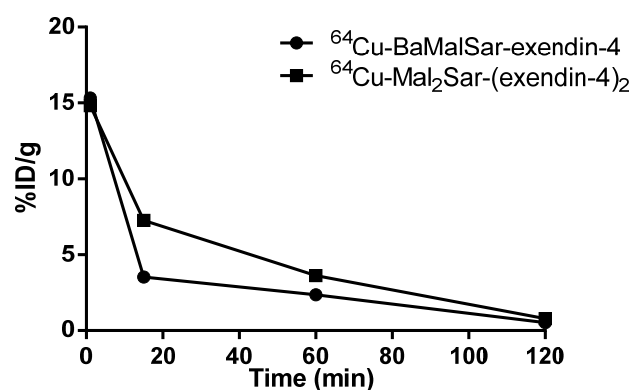

Figure S1. Blood clearance curves for  $^{64}\text{Cu}$ -BaMalSar-exendin-4 and  $^{64}\text{Cu}$ -Mal<sub>2</sub>Sar-(exendin-4)<sub>2</sub>.

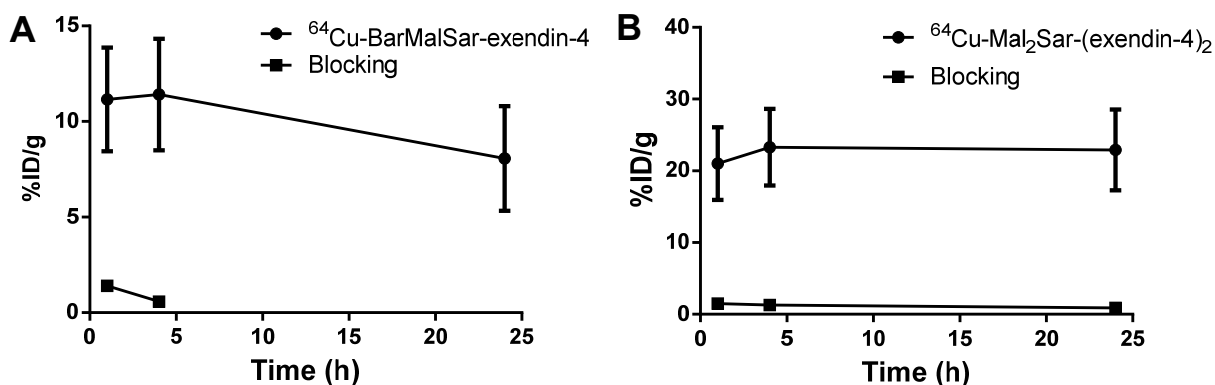

Figure S2. Time activity curves of the tumor uptake with or without co-injection with non-radiolabeled exendin-4: (A)  $^{64}\text{Cu}$ -BaMalSar-exendin-4 and (B)  $^{64}\text{Cu}$ -Mal<sub>2</sub>Sar-(exendin-4)<sub>2</sub>.

### ***In vivo* metabolic stability**

The *in vivo* metabolic stability of  $^{64}\text{Cu}$ -BaMaISar-exendin-4 and  $^{64}\text{Cu}$ -Mal<sub>2</sub>Sar-(exendin-4)<sub>2</sub> was evaluated in NOD/SCID mice. Thirty minutes after the intravenous injection of 7.4 MBq of  $^{64}\text{Cu}$ -BaMaISar-exendin-4 and  $^{64}\text{Cu}$ -Mal<sub>2</sub>Sar-(exendin-4)<sub>2</sub>, the mice were sacrificed. Urine was collected and diluted with 1 mL PBS, then analyzed by HPLC.

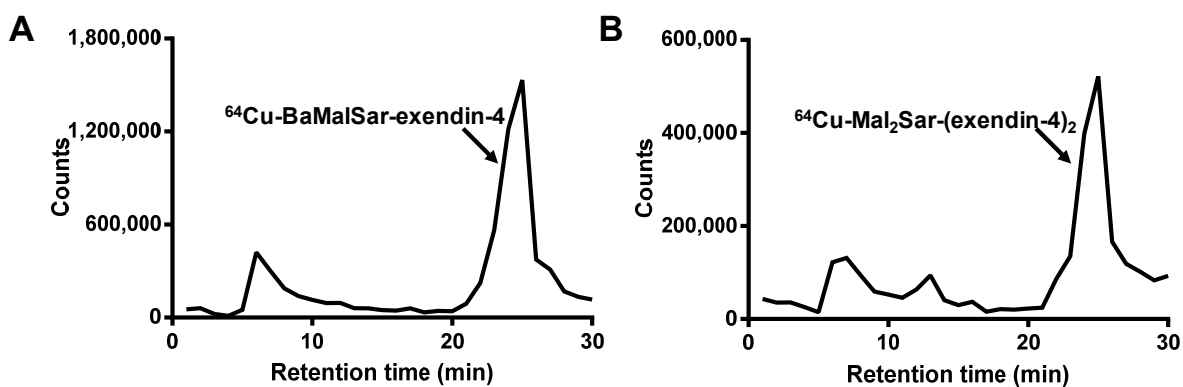

Figure S3. Metabolic stability in urine. (A)  $^{64}\text{Cu}$ -BaMaISar-exendin-4 and (B)  $^{64}\text{Cu}$ -Mal<sub>2</sub>Sar-(exendin-4)<sub>2</sub>.
